# Supplementary material for: Adaptation of French general practitioners for the management of nursing home patients during COVID-19 in 2020: a multilevel analysis
Source: Springer Nature journal article supplement (doi:10.1186/s12875-024-02560-9), 2024-09-28
Supplement: MOESM1 [file 12875_2024_2560_MOESM1_ESM.pdf]

### Supplementary table 1. List of the study partners.

| <b>Members of the ACCORD (Assembler, Coordonner, Comprendre, Rechercher, Débattre en soins primaires) network</b> | <b>Partners of the ACCORD network who also sent the survey link:</b>                                                      |
|-------------------------------------------------------------------------------------------------------------------|---------------------------------------------------------------------------------------------------------------------------|
| National College of Academic GPs (CNGE)                                                                           | French Society for General Practitioner Therapeutic Training (SFTG)                                                       |
| SPP-IR association (Multidisciplinarity in Primary Care, Innovation and Research)                                 | National College of General Practice (CMG),<br>French Society of Documentation and Research in General Practice (SFDRMG), |
| French Society of General Practice (SFMG)                                                                         | French Society of General Practice (SFMG)                                                                                 |
| National Federation of Multidisciplinary Health Houses (AVECSanté)                                                | French Association of Young Researchers in General Practice (FAYR-GP).                                                    |
| Research Institute of Health Care Centres (IJFR)                                                                  |                                                                                                                           |
| RETINES (Risk, Epidemiology, Territory, INformations, Education in health) unit, Côte d'Azur University           |                                                                                                                           |
| National Association of Health Teams in Primary Care (ASALEE)                                                     |                                                                                                                           |
| RESPIRE project (EHESP)                                                                                           |                                                                                                                           |
| Midwifery Department of Versailles Saint Quentin University.                                                      |                                                                                                                           |
