# Supplementary material for: Adaptation of French general practitioners for the management of nursing home patients during COVID-19 in 2020: a multilevel analysis
Source: Springer Nature journal article supplement (doi:10.1186/s12875-024-02560-9), 2024-09-28
Supplement: MOESM2 [file 12875_2024_2560_MOESM2_ESM.pdf]

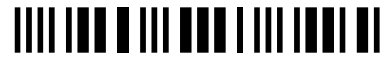

**Dear colleague, the COVID-19 pandemic has profoundly impacted daily life in France and affected the healthcare system.**

**The first early flash survey, conducted among more than 25,000 GPs (7,000 responses) between March 14 and 21, highlighted the rapid and massive adaptation of GPs in a context of uncertainty (first results [HERE](#)).**

**We will start a new phase of the pandemic from May 11, with the ending of the COVID-19 lockdown. In order to continue improving our response to the pandemic, it is essential to monitor the progress of adaptations in practices, not only in the management of COVID patients, but also in the organization of continuity of care, telemedicine and relations with nursing homes. The ACCORD1 network of general practice structures and partners, united around this issue, invites you to take part in this second flash survey (10 minutes). The results of the survey will be sent to you as soon as possible. Thank you very much in advance for your involvement.**

**1 Accord (Assembler, Coordonner, COmprendre, Recherche, Débattre en soins primaires) is a network project funded in 2020 by the Institut de Recherche en Santé Publique. It brings together various members (AVEC Santé, IJFR, CNGE, UVSQ's Midwifery Department, the Asalee association, SPP-IR and the RESPIRE project). It is intended to extend to other actors with an interest in primary care research.**

## **Part A: Part 1/3: Organization of the GP practice and professional practices**

**A1. Do you have sufficient quantities of the following personal protective equipment?**

surgical masks

FFP2 masks

disposable medical aprons

medical protective glasses

none of the above

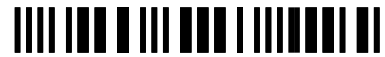

**A2. About the total volume of your individual clinical activity over the last 7 days (COVID and non-COVID patients seen in the GP practice, during a visit or by teleconsultation, including by telephone), did you receive:**

- more patients than usual
- the same number of patients as usual
- fewer patients than usual
- I haven't worked in the past 7 days

**A3. You mentioned that you had more patients than usual. Can you quantify it?**

- Between 0 and 25% more patients than usual
- Over 25% more patients than usual

**A4. You mentioned that you had fewer patients than usual. Can you quantify it?**

- between 75 and 100% of the usual number of patients
- patients between 50 and 75% of the usual number of patients
- patients between 25% and 50% of the usual number of patients
- < 25% of the usual number of patients

**A5. About your individual consultation activity (COVID and non COVID), in the last 7 days, what is your estimation of your:**

|                                                            | Not Provided             | ≤ 5                      | 6-10                     | 11-20                    | 21-30                    | >30                      |
|------------------------------------------------------------|--------------------------|--------------------------|--------------------------|--------------------------|--------------------------|--------------------------|
| mean number of home visits per working day?                | <input type="checkbox"/> |
| mean number of face-to-face consultations per working day? | <input type="checkbox"/> |
| mean number of videoconsultations per working day?         | <input type="checkbox"/> |
| mean number of phone consultations per working day?        | <input type="checkbox"/> |

**A6. Do you bill your video consultations?**

- Yes, always
- Yes, often
- Yes, sometimes
- Never or hardly ever

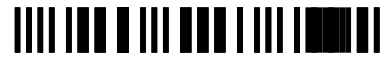

**A7. Do you bill your phone consultations?**

Yes, always

Yes, often

Yes, sometimes

Never or hardly ever

**A8. Were you providing video-consultations before the COVID-19 pandemic?**

Yes

No

**A9. Do you plan to develop or continue a teleconsultation activity after the pandemic?**

Yes

Probably yes

Probably no

No

**A10. How many patients have you managed for COVID-19-related reasons (suspicion, follow-up, contact cases...) in the last 7 days?**

|  |  |  |  |  |  |  |  |  |  |
|--|--|--|--|--|--|--|--|--|--|
|  |  |  |  |  |  |  |  |  |  |
|--|--|--|--|--|--|--|--|--|--|

**A11. What is the estimated rate of patients you have managed for COVID-19-related reasons (suspicion, follow-up, contact cases...) out of your total activity over the last 7 days?**

0 to 10%

11 to 20%

21 to 30%

31 to 40%

41 to 50%

51 to 60%

61 to 70%

71 to 80%

81 to 90%

91 to 100%



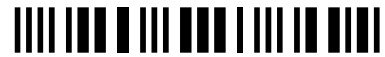

None of the above

Other

Other

Form with 20 vertical dashed lines for text entry.

**A16. Which antibiotic(s) do you prescribe?**

Form with 20 vertical dashed lines for text entry.

**A17. Sick leaves and COVID-19 isolation certificates**

**Do you currently feel in difficulty to prescribe a sick leave or to provide a COVID-19 isolation certificate?**

Never Rarely Often Always

To the family and friends of a patient with COVID-19 symptoms  .....  .....  .....

A person at actual or potential risk of a severe form of COVID-19  .....  .....  .....

To the family and friends of a patient at higher risk of a severe form of COVID-19  .....  .....  .....

**A18. Do patients currently contact you for questions or fears about returning to work (during consultations, by telephone, by e-mail...)?**

0 patient/day 1-5 patients/day >5 patients/day

because they feel inadequately protected at work  .....  .....

because they feel (or wonder) they are at higher risk of severe illness  .....  .....

because they want to look after their children at home  .....  .....

**Part B: Part 2/3: Health care organization**

About nursing home patients

About health care organization outside COVID-19

**B1. For the management of suspected COVID-19 patients, have you set up:**

dedicated time slots in your schedule

a dedicated space in your practice for waiting patients

home visits for suspected COVID-19 patients

teleconsultation (video or phone call) for suspected COVID-19 patients

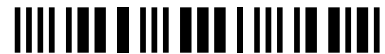

None of the above

**B2. Do you currently refer your suspected COVID-19 patients (a priori without hospitalization criteria) to:**

|                                                                                                               | Never                    | Rarely                   | Often                    | Always                   |
|---------------------------------------------------------------------------------------------------------------|--------------------------|--------------------------|--------------------------|--------------------------|
| A monodisciplinary or a multidisciplinary group, or a healthcare center reorganized to receive these patients | <input type="checkbox"/> | <input type="checkbox"/> | <input type="checkbox"/> | <input type="checkbox"/> |
| an outpatient center specifically created to receive these patients (e.g. gymnasium)                          | <input type="checkbox"/> | <input type="checkbox"/> | <input type="checkbox"/> | <input type="checkbox"/> |
| the hospital                                                                                                  | <input type="checkbox"/> | <input type="checkbox"/> | <input type="checkbox"/> | <input type="checkbox"/> |

**B3. Do you carry out consultations in an outpatient center dedicated to these patients, independently of your practice/structure?**

Yes

No

**B4. Do you accept patients living in the practice catchment area (other than your registered patients) in your practice/structure?**

Yes

No

**B5. Do you welcome colleagues from the same catchment area in your practice/structure for consultations dedicated to these patients?**

Yes

No

**B6. When one of your suspected COVID-19 patients calls 15 (a priori without hospitalization criteria) and requires a consultation, do you know where he or she is referred?**

You or your practice / structure

An outpatient center dedicated to COVID-19 patients (which is not your practice/structure)

SOS médecins service or equivalent

The hospital

I don't know

**B7. Who provides (or will provide) follow-up care for your patients considered as COVID-19 and not hospitalized?**

Yourself or another doctor within your practice/structure

A non-doctor healthcare provider within your practice/structure

Administrative staff member within your practice/structure

The hospital







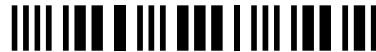

**B19. Have you accepted (or would you agree) to delegate to another doctor (general practitioner or nursing home medical director) the follow-up of your nursing home patients during the pandemic?**

Yes

No

**B20. Did you take the initiative to contact by phone some of your patients (e.g. vulnerable, with chronic diseases, etc.)?**

No, I did not call any patient

Yes, the ones I thought about

Yes, I made a list using some criteria (e.g. patients with 100% coverage by the French national insurance due to a chronic disease, body mass index)

Other (precise)

Other (precise)

|  |  |  |  |  |  |  |  |  |  |  |  |  |  |  |  |  |  |  |  |  |
|--|--|--|--|--|--|--|--|--|--|--|--|--|--|--|--|--|--|--|--|--|
|  |  |  |  |  |  |  |  |  |  |  |  |  |  |  |  |  |  |  |  |  |
|--|--|--|--|--|--|--|--|--|--|--|--|--|--|--|--|--|--|--|--|--|

**B21. What is currently your main attitude towards any reason for consultation other than those related to COVID-19?**

I try to limit the number of patients coming to the practice and provide instead a visit or teleconsultation

I try to limit the number of patients coming to the practice and suggest postponing health care

I encourage them to come to the practice

None of the 3, I have no specific attitude towards contact methods

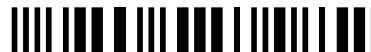

## Part C: Part 3/3 : Territorial dimension

End of the questionnaire: about your characteristics

**C1. Since the beginning of the COVID-19 pandemic, has the intensity of your relationships changed with:**

|                                                                                | Decreased                | Stable                   | Increased                | Not applicable           |
|--------------------------------------------------------------------------------|--------------------------|--------------------------|--------------------------|--------------------------|
| your GP colleagues                                                             | <input type="checkbox"/> | <input type="checkbox"/> | <input type="checkbox"/> | <input type="checkbox"/> |
| your medical colleagues from other specialties in town                         | <input type="checkbox"/> | <input type="checkbox"/> | <input type="checkbox"/> | <input type="checkbox"/> |
| your colleagues from other primary care professions (nurses pharmacists, etc.) | <input type="checkbox"/> | <input type="checkbox"/> | <input type="checkbox"/> | <input type="checkbox"/> |
| your local hospital                                                            | <input type="checkbox"/> | <input type="checkbox"/> | <input type="checkbox"/> | <input type="checkbox"/> |
| the general hospital or the university hospital (CHU)                          | <input type="checkbox"/> | <input type="checkbox"/> | <input type="checkbox"/> | <input type="checkbox"/> |
| coordination plans (regional support platform, etc.)                           | <input type="checkbox"/> | <input type="checkbox"/> | <input type="checkbox"/> | <input type="checkbox"/> |
| the social sector (social workers, Departmental homes for autonomy MDA, etc.)  | <input type="checkbox"/> | <input type="checkbox"/> | <input type="checkbox"/> | <input type="checkbox"/> |
| regional authorities (city hall, etc.)                                         | <input type="checkbox"/> | <input type="checkbox"/> | <input type="checkbox"/> | <input type="checkbox"/> |
| associations or charities or NGO                                               | <input type="checkbox"/> | <input type="checkbox"/> | <input type="checkbox"/> | <input type="checkbox"/> |
| the Regional Health Agency (ARS)                                               | <input type="checkbox"/> | <input type="checkbox"/> | <input type="checkbox"/> | <input type="checkbox"/> |
| the National health insurance service (CPAM)                                   | <input type="checkbox"/> | <input type="checkbox"/> | <input type="checkbox"/> | <input type="checkbox"/> |
| <b>Other (precise below)</b>                                                   | <input type="checkbox"/> | <input type="checkbox"/> | <input type="checkbox"/> | <input type="checkbox"/> |

**C2. Precise "other":**

|  |
|--|
|  |
|--|

**C3. Do you belong to a Health Territorial and Professional Community (HTPC) or a project of HTPC?**

|     |                          |
|-----|--------------------------|
| Yes | <input type="checkbox"/> |
| No  | <input type="checkbox"/> |

**C4. The HTPC**

|                                                                                                     |                          |
|-----------------------------------------------------------------------------------------------------|--------------------------|
| facilitated the organization of health care in the territory (covid center, phone regulation, etc.) | <input type="checkbox"/> |
| facilitated the sharing of personal protective equipment                                            | <input type="checkbox"/> |
| facilitated the sharing of information between professionals                                        | <input type="checkbox"/> |





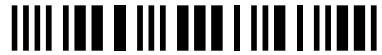

**C15. Are you at higher risk of a severe form of COVID-19?**

Yes

No

**C16. Are you afraid of catching a COVID-19 infection??**

I'm not worried at all

I'm a little worried

I'm moderately worried

I'm very worried

**C17. Among your registered patients, how many**

Patients were hospitalized due to COVID-19 since the beginning of the pandemic  
(still in hospital or already discharged)?

Patients died from COVID-19?

**C18. In order to provide a more detailed analysis of the management and care pathways of suspected COVID-19 patients, this flash survey could be linked to data from the French national health data system (SNDS).**

**To do this, we need your RPPS ID.**

**Would you be willing to give it to us?**

Yes

No

**C19. Your RPPS ID :**

**C20. Address of your GP practice**

*The address will be used to define the INSEE IRIS code for your territory, and will then be deleted from the database. It is very important in this survey to understand territorial dimensions.*

**C21. We would like to contact you again for a next wave of surveys.**

**Are you willing to be contacted again?**

Yes

No
