# Supplementary material for: Adaptation of French general practitioners for the management of nursing home patients during COVID-19 in 2020: a multilevel analysis
Source: Springer Nature journal article supplement (doi:10.1186/s12875-024-02560-9), 2024-09-28
Supplement: MOESM3 [file 12875_2024_2560_MOESM3_ESM.pdf]

**Supplementary table 4. Models' performances.**

| <b>STOPPING NHV VS REFERENCE</b> |                   |                     |                     |                       |                   |
|----------------------------------|-------------------|---------------------|---------------------|-----------------------|-------------------|
| <b>FIXED EFFECTS</b>             | <b>M0 : empty</b> | <b>M1 : level 1</b> | <b>M2 : level 2</b> | <b>M3 : level 1+2</b> | <b>M4 : final</b> |
| <b>Intercept</b>                 | 0.59              | -1.45               | -0.08               | -0.92                 | -1.06             |
| <b>p-value</b>                   | < 0.001           | < 0.001             | 0.73                | < 0.001               | < 0.001           |
| <b>RANDOM EFFECTS</b>            | <b>M0 : empty</b> | <b>M1 : level 1</b> | <b>M2 : level 2</b> | <b>M3 : level 1+2</b> | <b>M4 : final</b> |
| General contextual effect        |                   |                     |                     |                       |                   |
| <b>ICC (%)</b>                   | 6.1               | 5.8                 | 4.3                 | 4.0                   | 3.9               |
| <b>Variance</b>                  | 0.2121            | 0.2021              | 0.1487              | 0.1374                | 0.1352            |
| <b>PCV (%)</b>                   | Reference         | 4.7                 | 29.9                | 35.2                  | 36.2              |
| <b>MOR</b>                       | 1.55              | 1.54                | 1.44                | 1.42                  | 1.42              |
| <b>AUC (%)</b>                   | 68.8              | 71.6                | 67.4                | 71.4                  | 71.1              |
| Model goodness-of-fit            |                   |                     |                     |                       |                   |
| <b>AIC</b>                       | 1740.3            | 1680.8              | 1728.8              | 1669.4                | 1662.7            |
| <b>BIC</b>                       | 1750.7            | 1743.1              | 1765.2              | 1757.7                | 1725.0            |
| <b>Log-likelihood</b>            | -868.2            | -828.4              | -857.4              | -817.7                | -817.3            |
| <b>NUMERIC VS REFERENCE</b>      |                   |                     |                     |                       |                   |
| <b>FIXED EFFECTS</b>             | <b>M0 : empty</b> | <b>M1 : level 1</b> | <b>M2 : level 2</b> | <b>M3 : level 1+2</b> | <b>M4 : final</b> |
| <b>Intercept</b>                 | 1.05              | -1.46               | -1.14               | -1.64                 | -1.61             |
| <b>p-value</b>                   | < 0.001           | < 0.001             | < 0.001             | < 0.001               | < 0.001           |
| <b>RANDOM EFFECTS</b>            | <b>M0 : empty</b> | <b>M1 : level 1</b> | <b>M2 : level 2</b> | <b>M3 : level 1+2</b> | <b>M4 : final</b> |
| General contextual effect        |                   |                     |                     |                       |                   |
| <b>ICC (%)</b>                   | 5.6               | 6.0                 | 2.7                 | 3.0                   | 2.8               |
| <b>Variance</b>                  | 0.1961            | 0.211               | 0.009025            | 0.1033                | 0.09406           |
| <b>PCV (%)</b>                   | Reference         | -7.6                | 54.0                | 47.3                  | 52.0              |
| <b>MOR</b>                       | 1.53              | 1.55                | 1.33                | 1.36                  | 1.34              |
| <b>AUC (%)</b>                   | 69.5              | 69.6                | 65.6                | 68.7                  | 67.9              |
| Model goodness-of-fit            |                   |                     |                     |                       |                   |
| <b>AIC</b>                       | 1346.0            | 1324.6              | 1335.1              | 1313.2                | 1308.6            |
| <b>BIC</b>                       | 1356.1            | 1385.2              | 1370.5              | 1399.0                | 1369.2            |
| <b>Log-likelihood</b>            | -671.0            | -650.3              | -660.6              | -639.6                | -642.3            |
| <b>MIXED VS REFERENCE</b>        |                   |                     |                     |                       |                   |
| <b>FIXED EFFECTS</b>             | <b>M0 : empty</b> | <b>M1 : level 1</b> | <b>M2 : level 2</b> | <b>M3 : level 1+2</b> | <b>M4 : final</b> |
| <b>Intercept</b>                 | -0.74             | -0.85               | -0.98               | -1.12                 | -0.96             |
| <b>p-value</b>                   | < 0.001           | < 0.001             | < 0.001             | < 0.001               | < 0.001           |
| <b>RANDOM EFFECTS</b>            | <b>M0 : empty</b> | <b>M1 : level 1</b> | <b>M2 : level 2</b> | <b>M3 : level 1+2</b> | <b>M4 : final</b> |
| General contextual effect        |                   |                     |                     |                       |                   |
| <b>ICC (%)</b>                   | 4.6               | 5.3                 | 0.3                 | 0.8                   | 0.3               |
| <b>Variance</b>                  | 0.1602            | 0.1836              | 0.008983            | 0.02736               | 0.01059           |
| <b>PCV (%)</b>                   | Reference         | -14.6               | 94.4                | 82.9                  | 94.4              |
| <b>MOR</b>                       | 1.46              | 1.50                | 1.09                | 1.17                  | 1.10              |
| <b>AUC (%)</b>                   | 67.9              | 67.9                | 62.1                | 63.8                  | 62.9              |
| Model goodness-of-fit            |                   |                     |                     |                       |                   |
| <b>AIC</b>                       | 1585.2            | 1586.4              | 1564.9              | 15665.3               | 1560.6            |
| <b>BIC</b>                       | 1595.5            | 1647.9              | 1600.9              | 1653.5                | 1622.1            |
| <b>Log-likelihood</b>            | -790.6            | -781.2              | -775.5              | -766.2                | -768.3            |

ICC : Intra-class correlation coefficients, PCV: Proportional Change in Variance, MOR : Median Odds Ratio, AUC: Area Under the Curve, AIC: Akaike's Information Criterion, BIC: Bayesian Information Criterion
