# Supplementary material for: Adaptation of French general practitioners for the management of nursing home patients during COVID-19 in 2020: a multilevel analysis
Source: Springer Nature journal article supplement (doi:10.1186/s12875-024-02560-9), 2024-09-28
Supplement: MOESM4 [file 12875_2024_2560_MOESM4_ESM.pdf]

**Supplementary table 3. Distribution of respondent GPs by county.**

| County of practice           | n = 2,146 GPs |
|------------------------------|---------------|
| <b>Metropolitan France</b>   |               |
| 01 (Ain)                     | 22 (1,0%)     |
| 02 (Aisne)                   | 07 (0,3%)     |
| 03 (Allier)                  | 11 (0,5%)     |
| 04 (Alpes-de-Haute-Provence) | 05 (0,2%)     |
| 05 (Hautes-Alpes)            | 04 (0,2%)     |
| 06 (Alpes-Maritimes)         | 39 (1,8%)     |
| 07 (Ardèche)                 | 14 (0,7%)     |
| 08 (Ardennes)                | 10 (0,5%)     |
| 09 (Ariège)                  | 14 (0,7%)     |
| 10 (Aube)                    | 08 (0,4%)     |
| 11 (Aude)                    | 08 (0,4%)     |
| 12 (Aveyron)                 | 18 (0,8%)     |
| 13 (Bouches-du-Rhône)        | 21 (1,0%)     |
| 14 (Calvados)                | 29 (1,4%)     |
| 15 (Cantal)                  | 04 (0,2%)     |
| 16 (Charente)                | 16 (0,8%)     |
| 17 (Charente-Maritime)       | 27 (1,3%)     |
| 18 (Cher)                    | 11 (0,5%)     |
| 19 (Corrèze)                 | 20 (0,9%)     |
| 2A (Corse-du-Sud)            | 01 (0,1%)     |
| 2B (Haute-Corse)             | 02 (0,1%)     |
| 21 (Côte-d'Or)               | 26 (1,2%)     |
| 22 (Côtes-d'Armor)           | 17 (0,8%)     |
| 23 (Creuse)                  | 05 (0,2%)     |
| 24 (Dordogne)                | 10 (0,5%)     |
| 25 (Doubs)                   | 27 (1,3%)     |
| 26 (Drôme)                   | 28 (1,3%)     |
| 27 (Eure)                    | 16 (0,8%)     |
| 28 (Eure-et-Loir)            | 06 (0,3%)     |
| 29 (Finistère)               | 35 (1,6%)     |
| 30 (Gard)                    | 13 (0,6%)     |
| 31 (Haute-Garonne)           | 51 (2,4%)     |
| 32 (Gers)                    | 07 (0,3%)     |
| 33 (Gironde)                 | 67 (3,1%)     |
| 34 (Hérault)                 | 26 (1,2%)     |
| 35 (Ille-et-Vilaine)         | 36 (1,7%)     |
| 36 (Indre)                   | 08 (0,4%)     |
| 37 (Indre-et-Loire)          | 20 (0,9%)     |
| 38 (Isère)                   | 52 (2,4%)     |
| 39 (Jura)                    | 08 (0,4%)     |
| 40 (Landes)                  | 25 (1,2%)     |
| 41 (Loir-et-Cher)            | 11 (0,5%)     |
| 42 (Loire)                   | 46 (2,1%)     |
| 43 (Haute-Loire)             | 13 (0,6%)     |
| 44 (Loire-Atlantique)        | 108 (5,0%)    |
| 45 (Loiret)                  | 14 (0,7%)     |
| 46 (Lot)                     | 08 (0,4%)     |
| 47 (Lot-et-Garonne)          | 08 (0,4%)     |
| 48 (Lozère)                  | 02 (0,1%)     |
| 49 (Maine-et-Loire)          | 39 (1,8%)     |
| 50 (Manche)                  | 11 (0,5%)     |
| 51 (Marne)                   | 17 (0,8%)     |
| 52 (Haute-Marne)             | 04 (0,2%)     |
| 53 (Mayenne)                 | 15 (0,7%)     |
| 54 (Meurthe-et-Moselle)      | 22 (1,0%)     |
| 55 (Meuse)                   | 08 (0,4%)     |
| 56 (Morbihan)                | 22 (1,0%)     |
| 57 (Moselle)                 | 14 (0,7%)     |

|                            |                  |
|----------------------------|------------------|
| 58 (Nièvre)                | 04 (0,2%)        |
| 59 (Nord)                  | 108 (5,0%)       |
| 60 (Oise)                  | 11 (0,5%)        |
| 61 (Orne)                  | 04 (0,2%)        |
| 62 (Pas-de-Calais)         | 29 (1,4%)        |
| 63 (Puy-de-Dôme)           | 29 (1,4%)        |
| 64 (Pyrénées-Atlantiques)  | 28 (1,3%)        |
| 65 (Hautes-Pyrénées)       | 09 (0,4%)        |
| 66 (Pyrénées-Orientales)   | 14 (0,7%)        |
| 67 (Bas-Rhin)              | 52 (2,4%)        |
| 68 (Haut-Rhin)             | 27 (1,3%)        |
| 69 (Rhône)                 | 49 (2,3%)        |
| 70 (Haute-Saône)           | 10 (0,5%)        |
| 71 (Saône-et-Loire)        | 29 (1,4%)        |
| 72 (Sarthe)                | 11 (0,5%)        |
| 73 (Savoie)                | 28 (1,3%)        |
| 74 (Haute-Savoie)          | 23 (1,1%)        |
| 75 (Paris)                 | 26 (1,2%)        |
| 76 (Seine-Maritime)        | 44 (2,1%)        |
| 77 (Seine-et-Marne)        | 24 (1,1%)        |
| 78 (Yvelines)              | 34 (1,6%)        |
| 79 (Deux-Sèvres)           | 26 (1,2%)        |
| 80 (Somme)                 | 25 (1,2%)        |
| 81 (Tarn)                  | 20 (0,9%)        |
| 82 (Tarn-et-Garonne)       | 10 (0,5%)        |
| 83 (Var)                   | 11 (0,5%)        |
| 84 (Vaucluse)              | 12 (0,6%)        |
| 85 (Vendée)                | 39 (1,8%)        |
| 86 (Vienne)                | 29 (1,4%)        |
| 87 (Haute-Vienne)          | 11 (0,5%)        |
| 88 (Vosges)                | 21 (1,0%)        |
| 89 (Yonne)                 | 09 (0,4%)        |
| 90 (Territoire de Belfort) | 01 (0,1%)        |
| 91 (Essonne)               | 26 (1,2%)        |
| 92 (Hauts-de-Seine)        | 28 (1,3%)        |
| 93 (Seine-Saint-Denis)     | 18 (0,8%)        |
| 94 (Val-de-Marne)          | 38 (1,8%)        |
| 95 (Val-d'Oise)            | 06 (0,3%)        |
| <b>Overseas France</b>     |                  |
| 971 Guadeloupe             | 0 (0%)           |
| 972 Martinique             | 03 (0,1%)        |
| 973 Guyane                 | 0 (0%)           |
| 974 La Réunion             | 03 (0,1%)        |
| 976 Mayotte                | 0 (0%)           |
| <b>Missing values (NA)</b> | <b>81 (3,8%)</b> |

GPs : general practioners.
